# Supplementary material for: Pyrazolo-triazolo-pyrimidine Scaffold as a Molecular Passepartout for the Pan-Recognition of Human Adenosine Receptors
Source: MDPI journal article supplement (doi:10.3390/biom13111610), 2023-11-03
Supplement: s1 [file s1]

## Supplementary Information

### Pyrazolo-triazolo-pyrimidine Scaffold as a Molecular Passepartout for the Pan-Recognition of the Human Adenosine Receptors

Veronica Salmaso <sup>1,\*</sup>, Margherita Persico <sup>2</sup>, Tatiana Da Ros <sup>2</sup>, Giampiero Spalluto <sup>2</sup>, Sonja Kachler <sup>3</sup>, Karl-Norbert Klotz <sup>3</sup>, Stefano Moro <sup>1</sup>, Stephanie Federico<sup>2,\*</sup>

Molecular Modeling Section (MMS), Dipartimento di Scienze del Farmaco, Università di Padova, via Marzolo 5, I-35131 Padova, Italy; veronica.salmaso@unipd.it; stefano.moro@unipd.it

<sup>2</sup> Dipartimento di Scienze Chimiche e Farmaceutiche, Università degli Studi di Trieste, Via Licio Giorgieri 1, I-34127, Trieste, Italy; sfederico@units.it; margherita.persico@phd.units.it; daros@units.it; spalluto@units.it

<sup>3</sup> Institut für Pharmakologie, Universität of Würzburg, Versbacher Str. 9, D-97078, Würzburg, Germany; sonja.kachler@uni-wuerzburg.de; klotz@toxi.uni-wuerzburg.de

\* Correspondence: V.S. veronica.salmaso@unipd.it; Tel.: +39 049 827 5801; S.F. sfederico@units.it; Tel: +39 040 558 3671

|        |                                                                                                                                                           |
|--------|-----------------------------------------------------------------------------------------------------------------------------------------------------------|
| Page 2 | Table S1: Adenosine Receptors sequence identity and similarity.                                                                                           |
|        | Figure S1: Alignment between hA <sub>2B</sub> and hA <sub>2A</sub> sequences for homology modelling.                                                      |
|        | Figure S2: Alignment between hA <sub>3</sub> and hA <sub>1</sub> sequences for homology modelling.                                                        |
| Page 3 | Figure S3: Binding mode of compound ZM-241385 at A <sub>2A</sub> AR in X-ray structure 4EIY.<br>Figure S4: Sequence Alignment of all Adenosine Receptors. |
| Page 4 | Figure S5: Alternative docking pose of compound <b>11</b> at hA <sub>1</sub> , hA <sub>2A</sub> , hA <sub>2B</sub> , hA <sub>3</sub> ARs.                 |
|        | Labels Videos S1, S2, S3, S4                                                                                                                              |

**Table S1.** Sequence identity and similarity among hA<sub>1</sub>, hA<sub>2A</sub>, hA<sub>2B</sub> and hA<sub>3</sub> ARs. Full-sequence data are reported on the lower left (white background cells), and transmembrane helices (TM) data on the upper right (grey background cells).

|        | A1AR         | A2A AR       | A2B AR       | A3 AR        |
|--------|--------------|--------------|--------------|--------------|
| A1AR   | -            | I 55%, S 70% | I 52%, S 70% | I 56%, S 77% |
| A2A AR | I 38%, S 48% | -            | I 66%, S 82% | I 47%, S 66% |
| A2B AR | I 43%, S 59% | I 45%, S 56% | -            | I 45%, S 64% |
| A3 AR  | I 46%, S 65% | I 30%, S 45% | I 35%, 53%   | -            |

Data were retrieved from the GPCRdb web site (<https://gpcrdb.org>).

**Figure S1**

|                               |                                                                                                                                                                                                                                  |
|-------------------------------|----------------------------------------------------------------------------------------------------------------------------------------------------------------------------------------------------------------------------------|
| P29275   AA2BR_H<br>4EIY_prep | .....<br>MLLETQDALYVALELVIAALSVAGNVLCVAVGTANTLQTPNYFLVSLAAADVAVGLFAIPFAITISLGFCTDFYGCFLFACFVLVLTQSSIFSLAVAVDRYLAI<br>--XPIMGSSVYITVELAIAVLAILGNVLVCWAVLNSNLQNVINYFVVSLLAAADIAVGVLAIFFAITISTGFCAACHGCLFIACFVLVLTQSSIFSLAIAIDRYIAI |
| P29275   AA2BR_H<br>4EIY_prep | .....<br>CVPLRYKSLVTGTRARGVIAVLWVLAFLGIGLTPFLGWNSKDSATNNCTEPWDGTTNESCCLVKCLFENVVPMSYMVFYFNGCVLPPLLIMLVIIKIFLVACRQLQ<br>RIPLRYNGLVTGTRAKGIIAICWVLSFAIGLTPMLGWN-----EGQVACLFEDEVVPMNYMVYFNFACVLVPLLLMLGVYLRIFLAARRQLK              |
| P29275   AA2BR_H<br>4EIY_prep | .....<br>RTELM---DHSRTTLQREIHAAKSLAMIVGIFALCWLPHVAVNCVTLFQPAQGNKPKWAMNMAILSHANSVVNPVYAYRNRDFRYTFHKIISRYLLCQADVKS<br>QMESQPLPGERARSTLQKEVHAAKSLAIIVGLFALCWLPLHIINCFTFPCDCS-HAPLWLMYLAIVLSHTNSVNVNPFIIYAYRIREFRQTFRKIIIRSHVX       |
| P29275   AA2BR_H<br>4EIY_prep | .....<br>GNGQAGVQPALGVGL                                                                                                                                                                                                         |

**Figure S1.** Sequence alignment between hA<sub>2B</sub> AR and hA<sub>2A</sub> AR, from structure 4EIY (after reconstruction of missing atoms and retro mutation to wild-type). Extracellular loop 2 was removed before the alignment. Alignment used for homology modeling.

**Figure S2**

|                              |                                                                                                                                                                                                                                          |
|------------------------------|------------------------------------------------------------------------------------------------------------------------------------------------------------------------------------------------------------------------------------------|
| PODMS8   AA3R_H<br>5UEN_prep | .....<br>MPNNSTALSLANVTYITMEIFIGLCAIVGNVLVICVVKLNPSLQTTTFYFIVSLALADIAVGVLVMPPLAIVVSLGITIHFYSCLFMTCLLLIFTHASIMSLAIAVDRYL<br>-----XISAFQAAYIGIEVLIALVSFPGNVLVINAVKVNQALRDATFCFIVSLAVADVAVGALVPLAAILINIGPQTYFHTCLMVACPVLLITQSSILALLAIAVDRYL |
| PODMS8   AA3R_H<br>5UEN_prep | .....<br>RVKLTVRYKRVTTHRRIVLALGLCWLVSFLVGLTPMFGWN--MKLTSEYHRN---VTFLSCQFVSVMRMDYHVYFSLTWIFPLVVMCAIYLDIFYIIRKLSLNLN<br>RVKIPLRYKMVVTFRRAAVAIAGCWILSFVVGLTPMFGWNNLSAVERAWAANGSMGEFVVKCEFEKVISMEYHVVYFNFVWVLPPLLLMVLIIYLEVFYLIKQLNKKVSA     |
| PODMS8   AA3R_H<br>5UEN_prep | .....<br>SK-ETGAFYGREPKTAKSLFLVFLFALSWLPLSIINCIIYFNG--EVPQLVLYMGILLSHANSMMNPVYAYKIKKFKETYLLILKACVVCVCHPSDSLDTSEKNS<br>SSGDPQKYGKELKIAKSLALILFLFALSWLPLHILNCITLPCPSCHKPSILTYIAIFLTHGNSAMNPVYAFRIQKFRVTFKLIWNDFRCQFX                       |

**Figure S2.** Sequence alignment between hA<sub>3</sub> AR and hA<sub>1</sub> AR, from structure 5UEN (after reconstruction of missing atoms and retro mutation to wild-type). Alignment used for homology modeling.

Figure S3

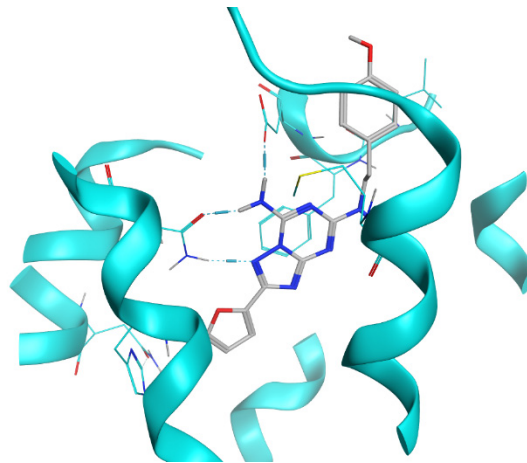

Figure S3. Binding mode of ZM-241385 (light grey) at hA<sub>2A</sub> AR (cyan) in X-ray structure 4EIY.

Figure S4

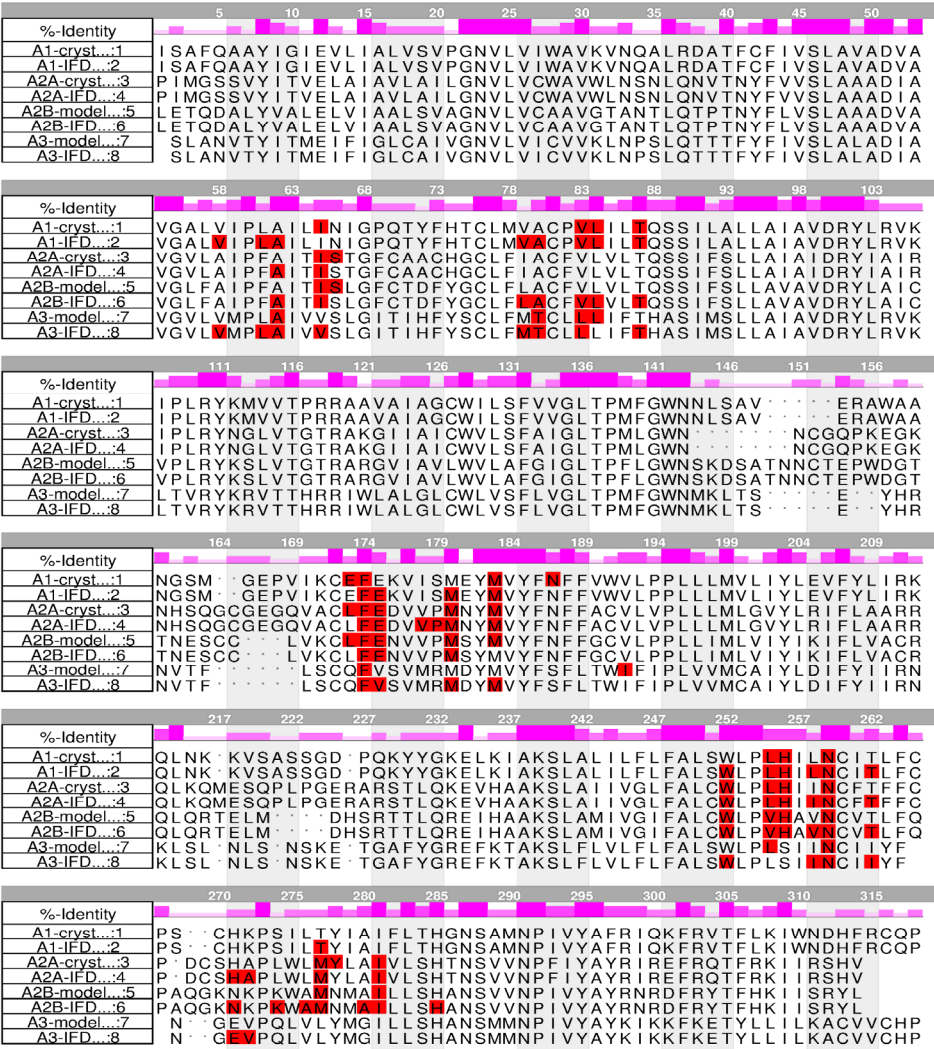

Figure S4. Sequence alignment from structure superposition of hA<sub>1</sub>, hA<sub>2A</sub>, hA<sub>2B</sub> and hA<sub>3</sub> ARs. Magenta histograms represent % Identity. Residues of the binding site (within 3 Å from the predicted pose of compound 4 or 11) are highlighted in red. To identify the binding site, 2 structures have been considered for each receptor: X-ray structure/homology model bound to compound 11 and Induced Fit refined structure bound to compound 4.

**Figure S5**

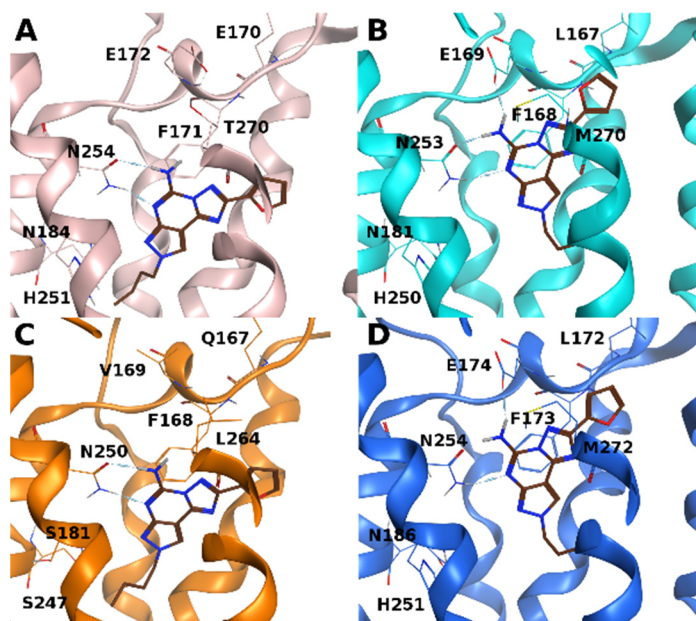

**Figure S5.** Docking pose of compound **11** (brown) at hA<sub>1</sub> (pink, **A**), hA<sub>2A</sub> (cyan, **B**), hA<sub>3</sub> (orange, **C**), hA<sub>2B</sub> (blue, **D**) ARs structures. The following receptor 3D structures were employed: experimental X-ray for hA<sub>1</sub> (PDB IDs: 5UEN) and hA<sub>2A</sub> ARs (PDB IDs: 4EIY), homology models for hA<sub>2B</sub> and hA<sub>3</sub> ARs (built on hA<sub>2A</sub> and hA<sub>1</sub>, respectively). A docking pose alternative to the ZM-241385-like one is displayed here.

**Video S1.**

Selected docking poses for compounds **1-12** (magenta) at hA<sub>1</sub> AR (pink) structure (PDB ID: 5UEN). Two alternative binding modes are shown for compounds **8, 9, 11** (z = ZM-241385-like; a = alternative). Compounds **8-12** were docked at the X-ray structure, compounds **1-7** were docked at the same structure refined by induced fit docking of compound **4**.

**Video S2.**

Selected docking poses for compounds **1-12** (magenta) at hA<sub>2A</sub> AR (cyan) structure (PDB ID: 4EIY). Two alternative binding modes are shown for compounds **8, 9, 10, 11, 12** (z = ZM-241385-like; a = alternative). Compounds **8-12** were docked at the X-ray structure, compounds **1-7** were docked at the same structure refined by induced fit docking of compound **4**.

**Video S3.**

Selected docking poses for compounds **1-12** (magenta) at hA<sub>2B</sub> AR (blue) structure (model built using hA<sub>2A</sub> AR structure 4EIY as template). Two alternative binding modes are shown for compounds **8, 9, 10, 11, 12** (z = ZM-241385-like; a = alternative). Compounds **8-12** were docked at the homology model, compounds **1-7** were docked at the same structure refined by induced fit docking of compound **4**.

**Video S4.**

Selected docking poses for compounds **1-12** (magenta) at hA<sub>3</sub> AR (orange) structure (model built using hA<sub>1</sub> AR structure 5UEN as template). Two alternative binding modes are shown for compounds **8, 9, 11, 12** (z = ZM-241385-like; a = alternative). Compounds **8-12** were docked at the homology model, compounds **1-7** were docked at the same structure refined by induced fit docking of compound **4**.
